# Supplementary material for: Clinical Efficacy and Tolerability of Praziquantel for Intestinal and Urinary Schistosomiasis—A Meta-analysis of Comparative and Non-comparative Clinical Trials
Source: PLOS journal article supplement (doi:10.1371/journal.pntd.0003286), 2014-11-20
Supplement: S4 (10.1371/journal.pntd.0003286.s004) [file journal.pntd.0003286.s004]

Supporting information Table S2. Study design of the included publications: risks of bias and attrition

| Species      | Publication<br>(name, year) | Country                | Endpoint<br>(month) | Age group             | Attrition    |              |              |              | Study design |          |                                                                                                                              |
|--------------|-----------------------------|------------------------|---------------------|-----------------------|--------------|--------------|--------------|--------------|--------------|----------|------------------------------------------------------------------------------------------------------------------------------|
|              |                             |                        |                     |                       | Enrolled (n) | Assessed (n) | Assessed (%) | Risk of bias | Control      | Blinding | Details                                                                                                                      |
| sh           | Bornmann 2001               | Gabon                  | 2                   | school                | 300          | 296          | 99%          | low          | cs           |          | ma, community based, computer-generated randomization, other risks of randomisation bias unclear                             |
|              | Burchard 1984               | Gabon                  | 2                   | school                | 165          | 138          | 84%          | high         | cs           |          | school based, risks of randomisation bias unclear                                                                            |
|              | Davis 1981                  | Zambia                 | 1                   | school                | 151          | 151          | 100%         | low          | cs           | 2        | ma, school based, Allocation concealment: double blind, low risks of randomisation bias                                      |
|              | de Clercq 2002              | Senegal                | 2                   | school                | 288          | 267          | 93%          | low          | cs           |          | school based, exhaustive, selective treatment study, unclear risks of randomisation bias                                     |
|              | Inyang-Etoh 2008            | Nigeria                | 2                   | school                | 312          | 262          | 84%          | high         | cs           |          | school based, exhaustive, placebo controlled, randomisation unclear                                                          |
|              | Keiser 2010                 | Ivory coast            | 1                   | school                | 83           | 83           | 100%         | low          | cs           |          | school based, exploratory open-label trial, computer-generated randomization code, unclear risks of other randomisation bias |
|              | King 2002                   | Kenya                  | 2                   | all ages              | 291          | 200          | 69%          | high         | cs           |          | ma, school based, computer-generated sequence, unclear risks of other randomisation bias                                     |
|              | Latham 1990                 | Kenya                  | 2                   | school                | 48           | 48           | 100%         | low          | cs           |          | school-based, male only, unclear risks of randomisation bias                                                                 |
|              | McMahon 1983                | Tanzania               | 2                   | all ages              | 138          | 125          | 91%          | low          | cs           |          | ma, school based, exhaustive, stratified randomisation, unclear risks other randomisation bias                               |
|              | McMahon 1979                | Tanzania               | 1                   | school                | 90           | 77           | 86%          | high         | cs           |          | ma, unclear risks of randomisation bias                                                                                      |
|              | Midzi 2008                  | Zimbabwe               | 2                   | school                | 675          | 624          | 92%          | low          | sts          | na       | school based, exhaustive, selective treatment study                                                                          |
|              | N'goran 2003                | Ivory coast            | 1                   | school                | 440          | 354          | 80%          | high         | sts          | na       | School based, exhaustive, selective treatment study                                                                          |
|              | Oyideran 1981               | Nigeria                | 1                   | school<br>young adult | 90           | 82           | 91%          | low          | cs           |          | ma, placebo controlled, unclear risks of other randomisation bias                                                            |
|              | Rey 1983                    | Niger                  | 1                   | school<br>adult       | 208          | 188          | 90%          | low          | cs           |          | ma, school based, unclear risks of randomisation bias                                                                        |
|              | Sissoko 2009                | Mali                   | 1                   | school                | 800          | 781          | 98%          | low          | cs           | 1        | School based, block randomization, single blind, high quality                                                                |
| sh + si      | Tchuente 2004               | Cameroon               | 1                   | school                | 674          | 515          | 76%          | high         | sts          | na       | school based, exhaustive, selective treatment study                                                                          |
|              | Wilkins 1987                | Gambia                 | 1                   | school                | 619          | 619          |              | na           | sts          | na       | ma, computer-generated, unclear risks of randomisation bias and attrition bias incomplete                                    |
| sh + si      | Kern 1984                   | Gabon                  | 2                   | school                | 158          | 158          |              | na           | cs           |          | exhaustive, school based, unclear risks of randomisation bias                                                                |
| sj           | Belizario 2007              | Philippines            | 1                   | school                | 206          | 203          | 99%          | low          | cs           | 2        | school based, randomized, double blind                                                                                       |
|              | Hou 2008                    | China                  | 2                   | all ages              | 205          | 196          | 96%          | low          | cs           | 2        | hospital based, randomized, double-blind, placebo-controlled, other bias unclear                                             |
|              | Olliaro 2011                | Philippines            | 1                   | school                | 203          | 200          | 99%          | low          | cs           | 2        | ma, double-blind trial, computerised block size of 4, low risk of bias                                                       |
| sj/sm/<br>sh | Olds 1999                   | Kenya,<br>Phillipines, | 2                   | school                | 1540         | 1540         | 100%         | low          | cs           | 2        | school based, double blind placebo controlled, multisite, randomised block design of size 80, low risk of bias               |

| China |                   |              |     |           |      |      |      |      |     |    |                                                                                                                                                 |
|-------|-------------------|--------------|-----|-----------|------|------|------|------|-----|----|-------------------------------------------------------------------------------------------------------------------------------------------------|
| sm    | Abu elyazed 1998  | Egypt        | 2   | all ages  | 975  | 939  | 96%  | low  | sts | na | community based, exhaustive, 2 selective treatment studies                                                                                      |
|       | Barakat 2005      | Egypt        | 1   | all ages  | 104  | 83   | 80%  | high | cs  |    | community based, exhaustive, randomized in two groups, the first for Myrrh and the second for praziquantel, unclear risks of randomisation bias |
|       | Berhe 1999        | Ethiopia     | 2   | school    | 611  | 541  | 89%  | high | sts | na | school based, exhaustive, selective treatment study                                                                                             |
|       | Botros 2005       | Egypt        | 1,2 | all ages  | 379  | 271  | 72%  | high | cs  |    | community based, stratified randomisation, unclear risks of randomisation bias                                                                  |
|       | daSilva 1986      | Brazil       | 1   | all ages  | 120  | 94   | 78%  | high | cs  | 2  | ma, based not reported, double blind, unclear risks of other randomisation bias                                                                 |
|       | Declerq 2000b     | Senegal      | 2   | all ages  | 180  | 156  | 87%  | high | cs  |    | hospital based, unclear risks of randomisation bias                                                                                             |
|       | Declerq tmih 2000 | Senegal      | 2   | all ages  | 110  | 110  | 100% | low  | cs  |    | ma, community based, unclear risks of randomisation bias                                                                                        |
|       | Degu 2002         | Ethiopia     | 2   | school    | 154  | 148  | 96%  | low  | sts | na | school based, exhaustive, selective treatment study                                                                                             |
|       | Friis 1988        | Botswana     | 2   | school    | 81   | 81   | 100% | low  | sts | na | school based, not exhaustive, selective treatment study, stratified randomisation                                                               |
|       | Ghandour 1995     | Saudi Arabia | 1   | all ages  | 170  | 170  | 100% | low  | sts | na | community based, exhaustive, selective treatment study                                                                                          |
|       | Gryseels 1987     | Burundi      | 2   | all ages  | 1138 | 1049 | 92%  | low  | sts | na | community based, exhaustive, selective treatment study                                                                                          |
|       | Guisse 1987       | Senegal      | 1   | school    | 130  | 130  | 100% | low  | cs  |    | ma, community based, unclear risks of randomisation bias and attrition bias incomplete                                                          |
|       | Homeida 1989      | Sudan        | 2   | all ages  | 885  | 806  | 91%  | low  | cs  | 1  | ma, community based, single blind, unclear risks of randomisation bias                                                                          |
|       | Ismail 1994       | Egypt        | 2   | all ages  | 463  | 436  | 94%  | low  | sts | na | community based, exhaustive, selective treatment study                                                                                          |
|       | Kabatereine 2003  | Uganda       | 2   | all ages  | 617  | 482  | 78%  | high | sts | na | community based, not exhaustive, selective treatment study                                                                                      |
|       | Kardaman 1983     | Sudan        | 1   | all ages  | 388  | 347  | 89%  | high | sts | na | ma, community based, exhaustive, unclear risks of randomisation bias                                                                            |
|       | Massoud 1984      | Egypt        | 1   | school    | 179  | 179  | 100% | low  | cs  |    | school based, exhaustive, unclear risks of randomisation bias                                                                                   |
|       | McMahon 1981      | Tanzania     | 1   | all ages  | 102  | 91   | 89%  | high | cs  |    | ma, community based, exhaustive, unclear risks of randomisation bias                                                                            |
|       | Metwally 1995     | Egypt        | 1   | school    | 506  | 366  | 72%  | high | cs  |    | school based, exhaustive, stratified randomisation, unclear risks of randomisation bias                                                         |
|       | Mohamed 2009      | Sudan        | 1   | school    | 102  | 92   | 90%  | low  | cs  |    | school based, open label, unclear risks of randomisation bias                                                                                   |
|       | Navaratnam 2012   | Uganda       | 1   | preschool | 297  | 203  | 68%  | high | cs  |    | community based, exhaustive, every second child assigned to the same treatment arm, other risks of randomisation bias unclear                   |
|       | Obonyo 2010       | Kenya        | 1   | school    | 212  | 204  | 96%  | low  | cs  | 1  | school based, open-label randomised trial, computer-generated block, single blind, unclear other risks of bias                                  |
|       | Olliaro 2011      | Brazil       | 1   | all ages  | 196  | 190  | 97%  | low  | cs  | 2  | ma, double-blind trial, computerised block size of 4, sealed and numbered envelopes                                                             |
|       | Olliaro 2011      | Mauritania   | 1   | all ages  | 186  | 185  | 99%  | low  | cs  | 2  | ma, double-blind trial, computerised block size of 4,                                                                                           |

|       |                       |             |   |           |      |      |      |      |     |    |                                                                                                          |
|-------|-----------------------|-------------|---|-----------|------|------|------|------|-----|----|----------------------------------------------------------------------------------------------------------|
|       |                       |             |   |           |      |      |      |      |     |    | sealed and numbered envelopes                                                                            |
|       | Olliaro 2011          | Tanzania    | 1 | school    | 271  | 244  | 90%  | low  | cs  | 2  | ma, double-blind trial, computerised block size of 4, sealed and numbered envelopes                      |
|       | Raso 2004             | Ivory coast | 2 | all ages  | 200  | 161  | 81%  | high | sts | na | community based, exhaustive, selective treatment study                                                   |
|       | Simonsen 1990         | Ethiopia    | 1 | school    | 265  | 206  | 78%  | high | sts | na | school based, exhaustive, selective treatment study                                                      |
|       | Sousa-Figueiredo 2012 | Uganda      | 1 | preschool | 369  | 305  | 83%  | high | sts | na | community based, exhaustive, selective treatment study                                                   |
|       | Stelma 1997           | Senegal     | 2 | all ages  | 138  | 138  | 100% | low  | cs  |    | community based, stratified randomisation, unclear risk of bias                                          |
|       | Taddese 1988          | Ethiopia    | 1 | adult     | 200  | 191  | 96%  | low  | cs  |    | ma, farm based, randomly assigned, unclear risk of bias                                                  |
|       | Teesdale 1984         | Malawi      | 1 | all ages  | 69   | 69   | 100% | low  | cs  |    | ma, community based, exhaustive, stratified randomisation, unclear risk of other bias                    |
|       | Thiongo'o 2002        | Kenya       | 2 | school    | 1018 | 1018 |      | na   | cs  |    | school based, exhaustive, unclear risk of randomisation bias and attrition bias incomplete               |
|       | Utzinger 2000         | Ivory coast | 1 | school    | 253  | 194  | 77%  | high | sts | na | school based, selective treatment study, unclear risk of randomisation bias                              |
| sm+sh | El Tayeb 1988         | Sudan       | 1 | school    | 111  | 111  | 100% | low  | cs  |    | school based, exhaustive, randomisation on the toss of a coin, unclear other risks of randomisation bias |
|       | Kardaman 1983         | Sudan       | 1 | all ages  | 43   | 37   | 86%  | high | sts | na | community based, exhaustive, selective treatment study                                                   |
|       | Kardaman 1985         | Sudan       | 2 | school    | 373  | 373  | 100% | low  | sts | na | ma, school based, exhaustive, unclear risks of randomisation bias                                        |
|       | Taylor 1988           | Zimbabwe    | 1 | school    | 220  | 211  | 96%  | low  | cs  | 1  | ma, school based, exhaustive, single blind, unclear risk of other bias                                   |
|       |                       |             |   |           |      |      |      |      |     |    |                                                                                                          |

Legend: Blinding, 1: single, 2: double; endpoint, 1: within one month, 2: within two months; sm, *S. mansoni*; sh, *S. haematobium*; sj, *S. japonicum*; cs, comparative study; sts, selective treatment study; na, not applicable; ma, included in *S. mansoni* or *S. haematobium* meta-analysis; Exhaustive: all people screened whether community or school based study; Selective treatment study: non-comparative study using praziquantel; The attrition risk bias is measured as the number of patients not assessed at endpoint time out of the number of patients enrolled and considered high when greater than 10%.
